# Supplementary material for: Amplifying the electrochemical footprint of <1000 molecules in a dissolving microdroplet
Source: Royal Society of Chemistry journal article supplement (doi:10.1039/d4an00504j), 2024-01-01
Supplement: d4an00504j2.pdf [file d4an00504j2.pdf]

## Supplementary Information

# Amplifying the Electrochemical Footprint of < 1000 Molecules in a Dissolving Microdroplet

James H. Nguyen<sup>a</sup>, Ashutosh Rana<sup>a</sup>, and Jeffrey E. Dick<sup>a,b\*</sup>

<sup>a</sup>Department of Chemistry, Purdue University, West Lafayette, IN, 47907, USA

<sup>b</sup>Elmore Family School of Electrical and Computer Engineering, Purdue University, West Lafayette, IN, 47907, USA

\*Corresponding Author(s)

Jeffrey E. Dick ([jdick@purdue.edu](mailto:jdick@purdue.edu))

### Table of Contents

| Figure or Theory: Description                                                                                                                                                              | Page Number |
|--------------------------------------------------------------------------------------------------------------------------------------------------------------------------------------------|-------------|
| <b>Figure S1:</b> Cyclic voltammograms 0.5 mM (Cp*) <sub>2</sub> Fe <sup>(II)</sup> in an aqueous bulk phase of 200 mM K <sub>3</sub> [Fe(CN) <sub>6</sub> ] in 10 mM NaClO <sub>4</sub> . | S2          |

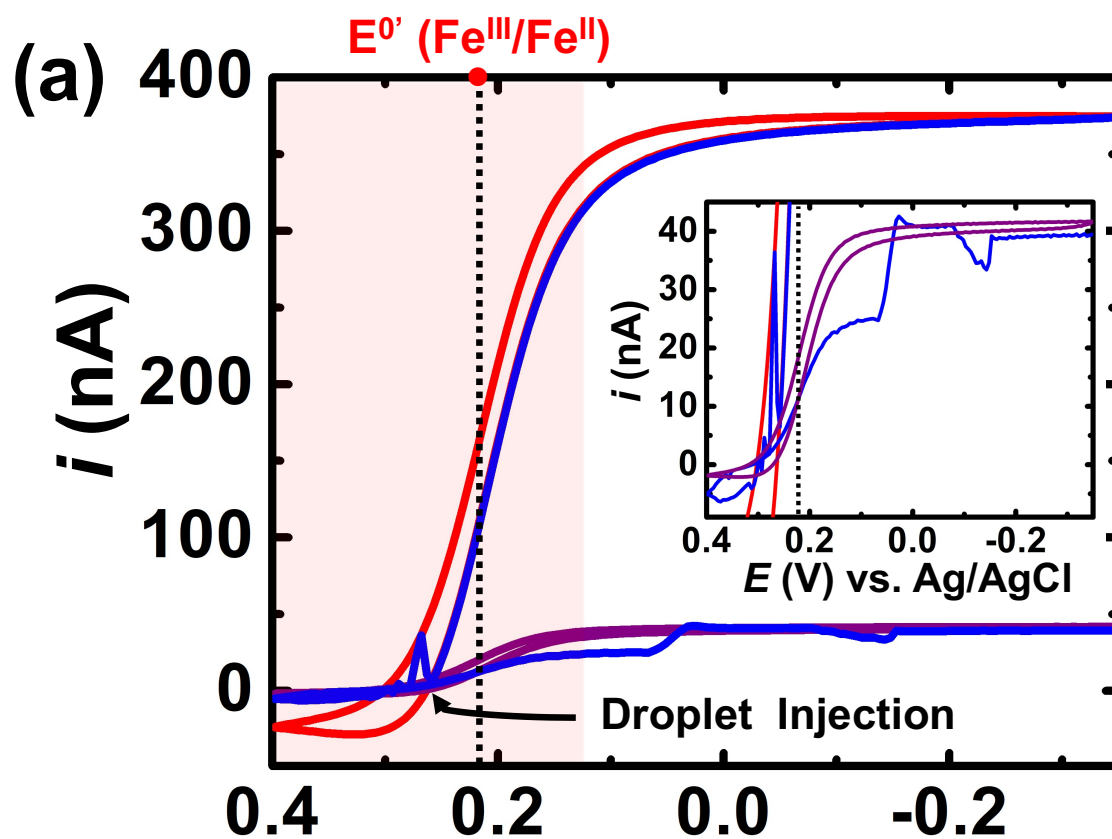

**Figure S1.** (a) Cyclic voltammograms recorded during the dissolution of a DCE droplet containing 0.5 mM  $(\text{Cp}^*)_2\text{Fe}^{\text{III}}$  in an aqueous bulk phase of 200 mM  $\text{K}_3[\text{Fe}(\text{CN})_6]$  in 10 mM  $\text{NaClO}_4$ . The dashed lines represent the standard apparent potential for the redox couple  $\text{Fe}(\text{CN})_6^{3-} / \text{Fe}(\text{CN})_6^{4-}$ . Inset (i) shows a close up of the purple voltammogram showing suppressed redox activity of  $\text{Fe}(\text{CN})_6^{3-} / \text{Fe}(\text{CN})_6^{4-}$  and absence of any signal from  $\text{Cp}_2^*(\text{Fe})^{\text{II}}$ .
